# Supplementary material for: Adjunctive therapeutic strategy for in-stent thrombosis: in vitro pharmacodynamic evaluation of COX-1 inhibitor 3d combined with catheter-directed thrombolysis
Source: Royal Society of Chemistry journal article supplement (doi:10.1039/d6ra01870j), 2026-05-15
Supplement: d6ra01870j1.pdf [file d6ra01870j1.pdf]

**Adjunctive Therapeutic Strategy for In-Stent Thrombosis: *In Vitro***  
**Pharmacodynamic Evaluation of COX-1 Inhibitor 3d Combined with**  
**Catheter-Directed Thrombolysis**

Bo Ma <sup>1\*</sup>, Zenghui Liang <sup>1</sup>, Liping Fu <sup>1</sup>, Yanbiao Ma <sup>1</sup>, Qinghe Sun <sup>1</sup>, Xuchen Lv <sup>1</sup>

<sup>1</sup> Cangzhou People's Hospital, Interventional Vascular Surgery, Cangzhou, China, 061000

---

\* Correspondent. E-mail: bobo73112026@163.com

## Table of Contents

|                                                         |    |
|---------------------------------------------------------|----|
| <i><sup>1</sup>H and <sup>13</sup>C NMR of 3a</i> ..... | 1  |
| <i><sup>1</sup>H and <sup>13</sup>C NMR of 3b</i> ..... | 2  |
| <i><sup>1</sup>H and <sup>13</sup>C NMR of 3c</i> ..... | 3  |
| <i><sup>1</sup>H and <sup>13</sup>C NMR of 3d</i> ..... | 4  |
| <i><sup>1</sup>H and <sup>13</sup>C NMR of 3e</i> ..... | 5  |
| <i><sup>1</sup>H and <sup>13</sup>C NMR of 3f</i> ..... | 6  |
| <i><sup>1</sup>H and <sup>13</sup>C NMR of 3g</i> ..... | 7  |
| <i><sup>1</sup>H and <sup>13</sup>C NMR of 3h</i> ..... | 8  |
| <i><sup>1</sup>H and <sup>13</sup>C NMR of 3i</i> ..... | 9  |
| <i><sup>1</sup>H and <sup>13</sup>C NMR of 3j</i> ..... | 10 |
| <i><sup>1</sup>H and <sup>13</sup>C NMR of 3k</i> ..... | 11 |
| <i><sup>1</sup>H and <sup>13</sup>C NMR of 3l</i> ..... | 12 |
| <i>HPLC and Mass spectrum of 3d</i> .....               | 13 |

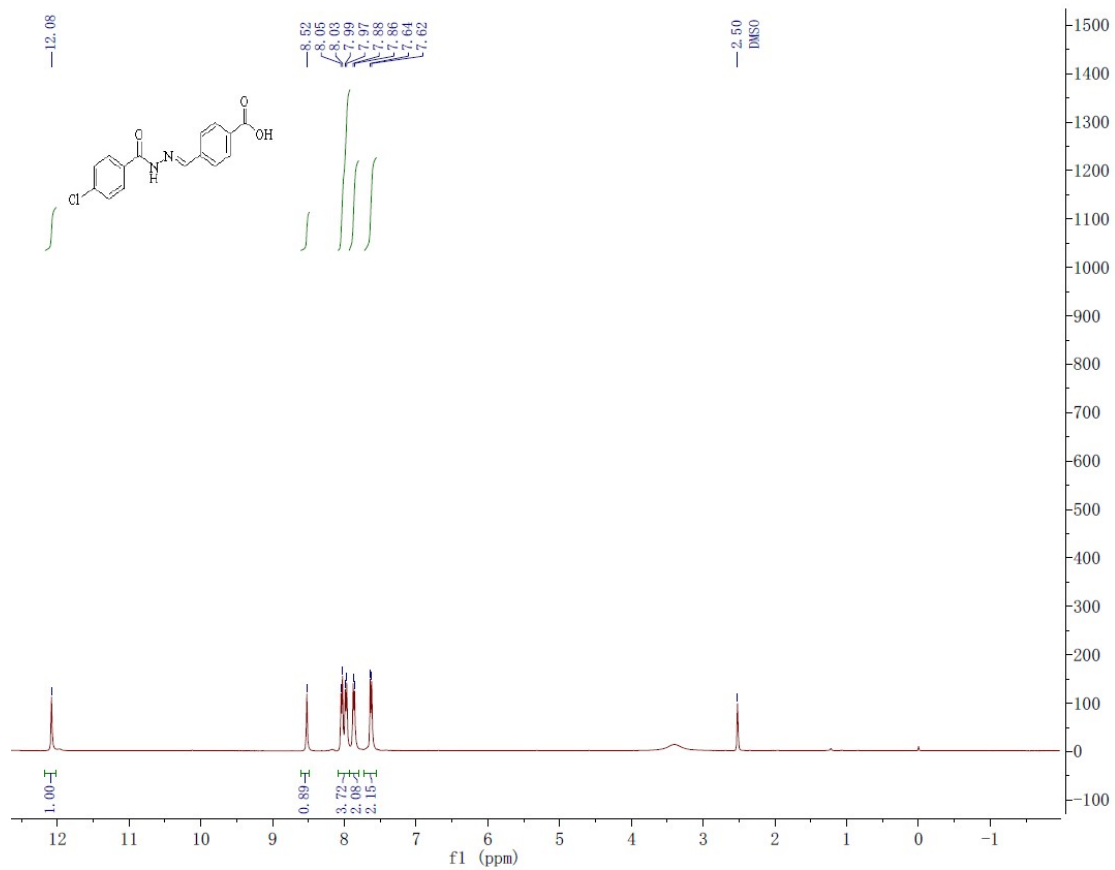

Figure 1.  $^1\text{H}$  NMR of **3a** (400 MHz, DMSO)

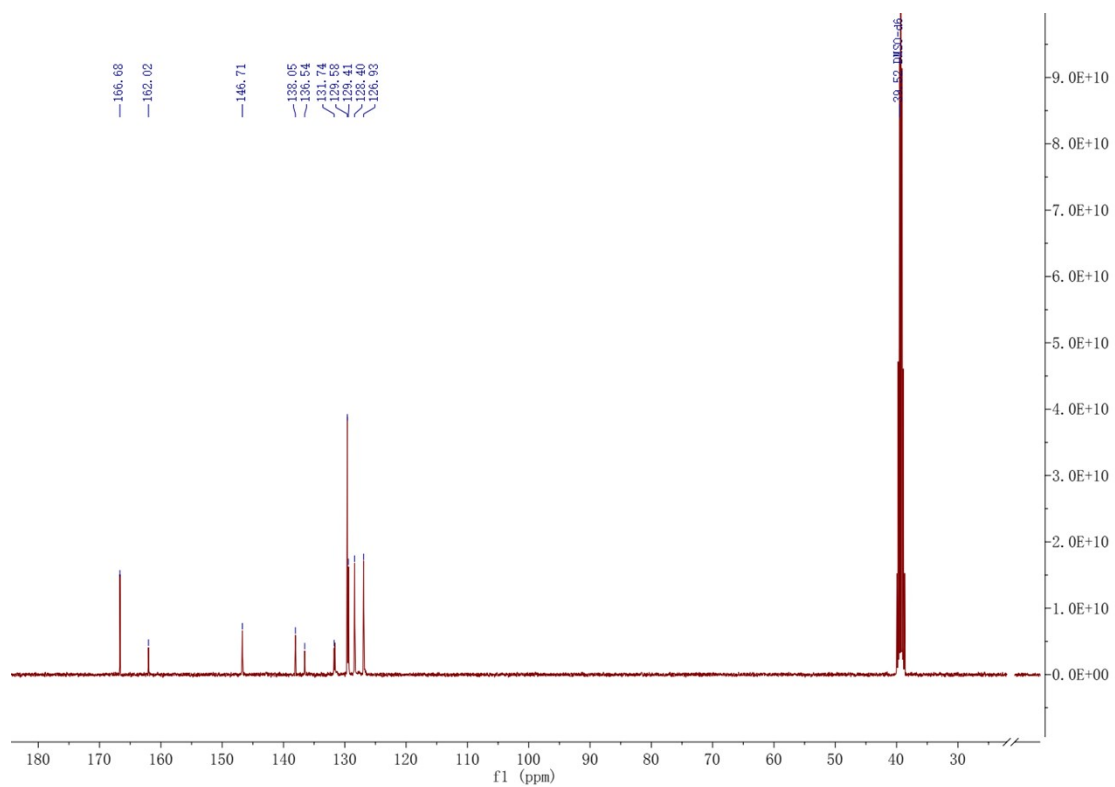

Figure 2.  $^{13}\text{C}$  NMR of **3a** (100 MHz, DMSO)

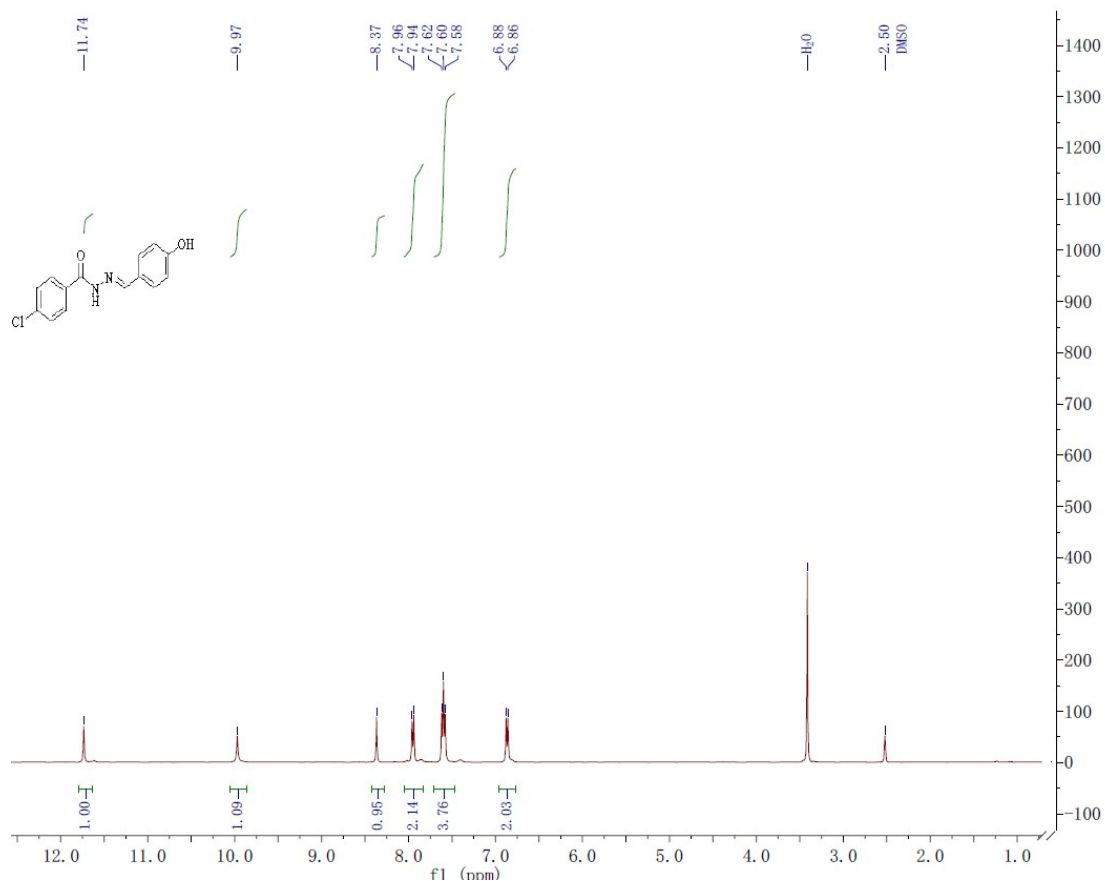

Figure 3.  $^1\text{H}$  NMR of **3b** (400 MHz, DMSO)

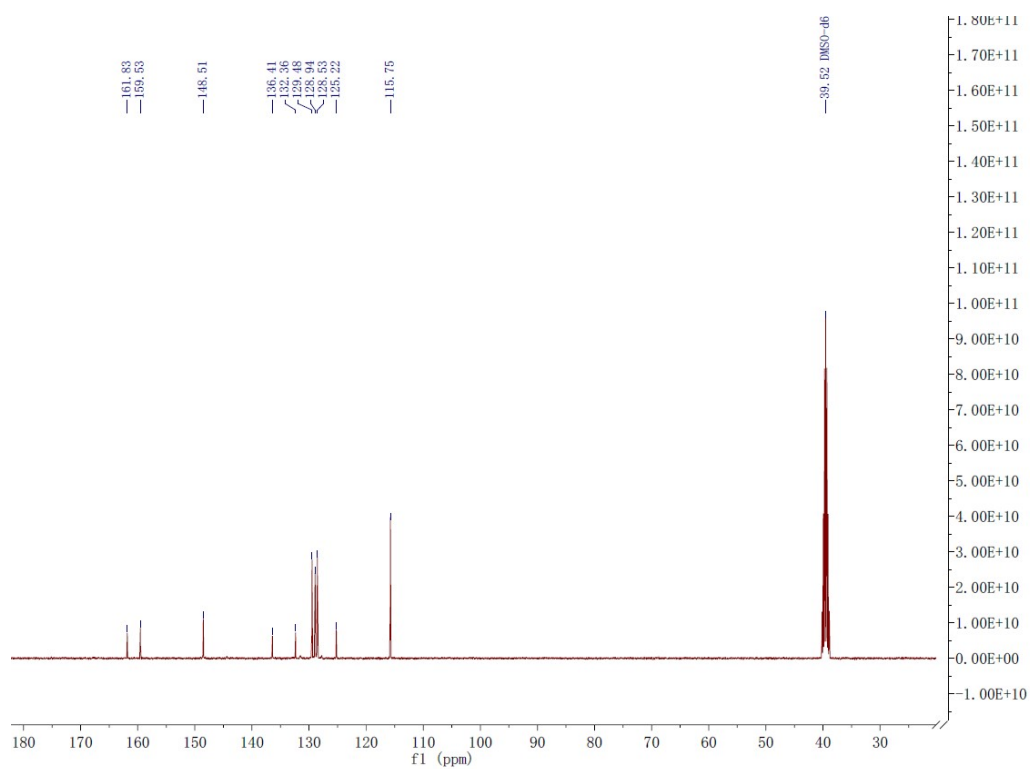

Figure 4.  $^{13}\text{C}$  NMR of **3b** (100 MHz, DMSO)

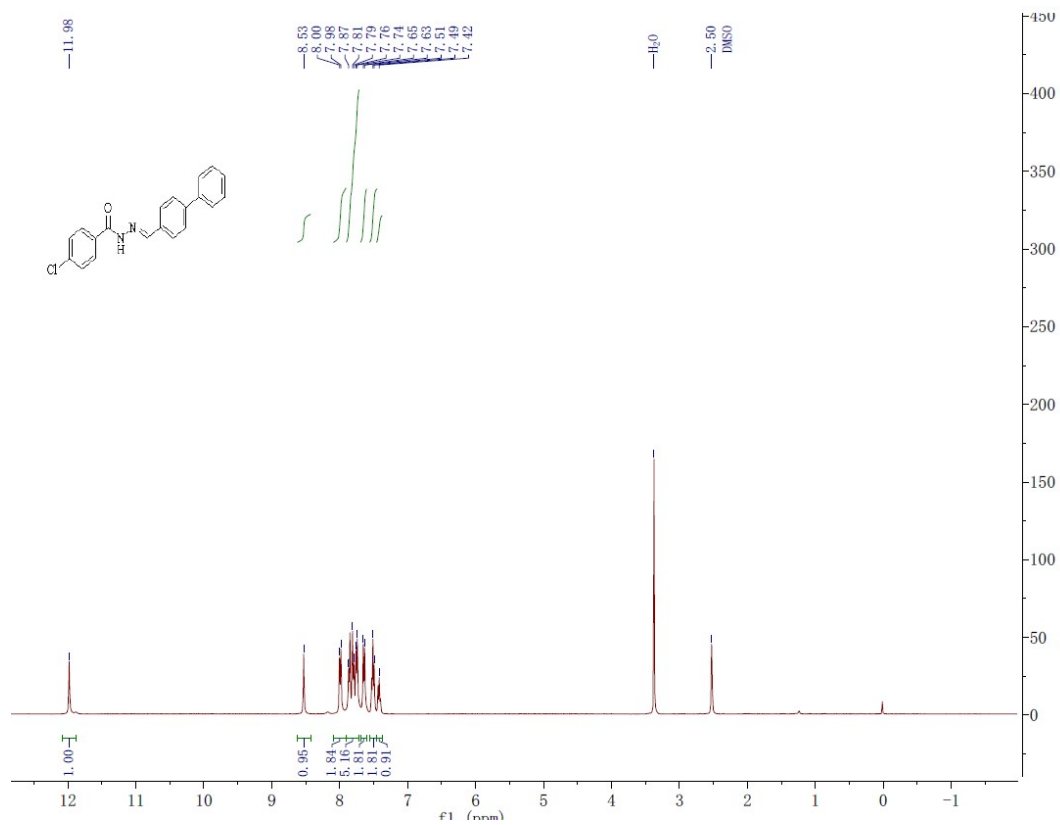

Figure 5. <sup>1</sup>H NMR of **3c** (400 MHz, DMSO)

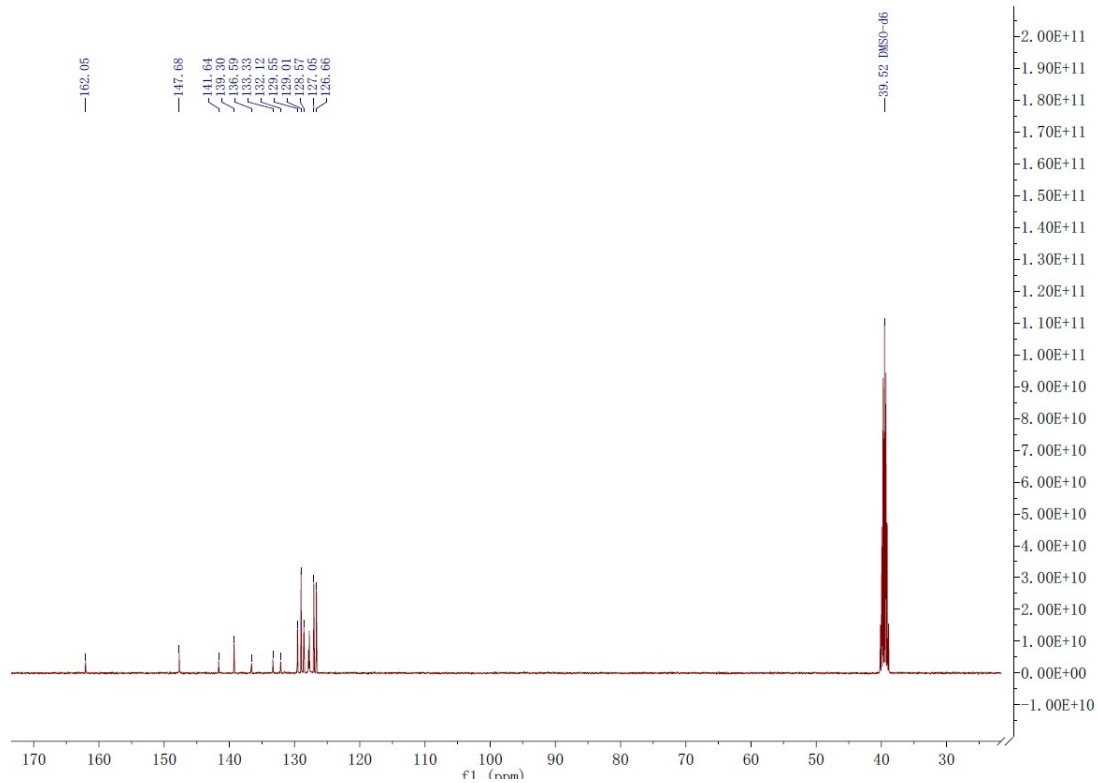

Figure 6. <sup>13</sup>C NMR of **3c** (100 MHz, DMSO)

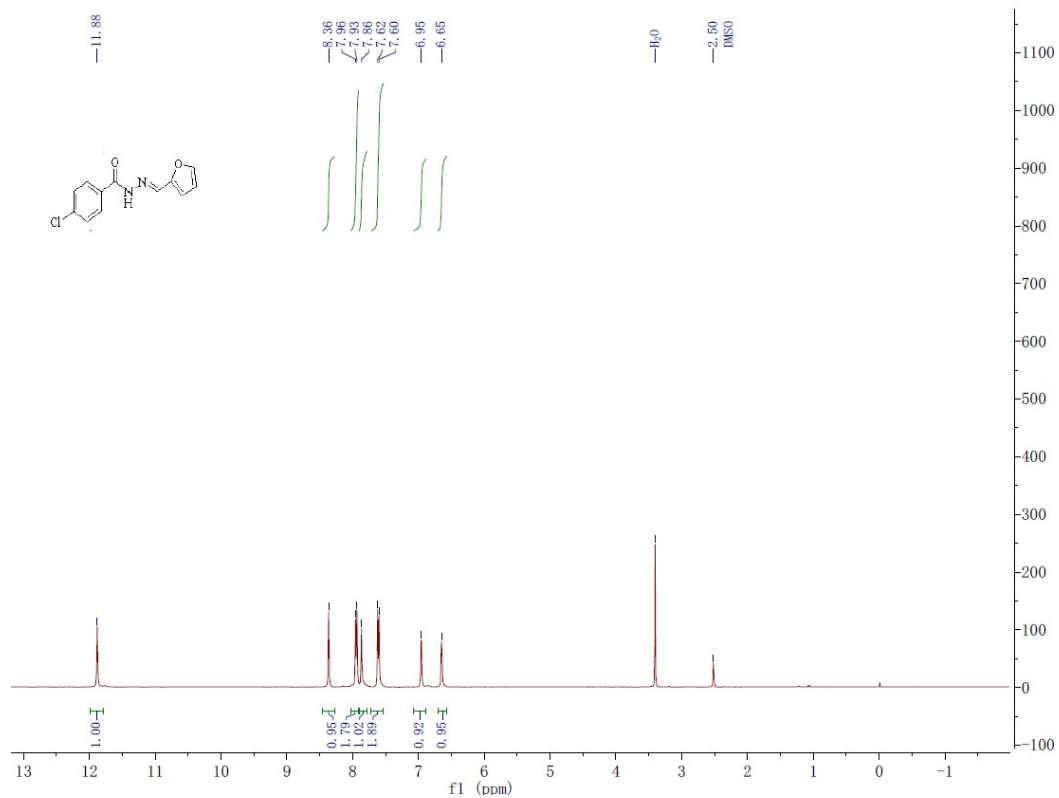

Figure 7.  $^1\text{H}$  NMR of **3d** (400 MHz, DMSO)

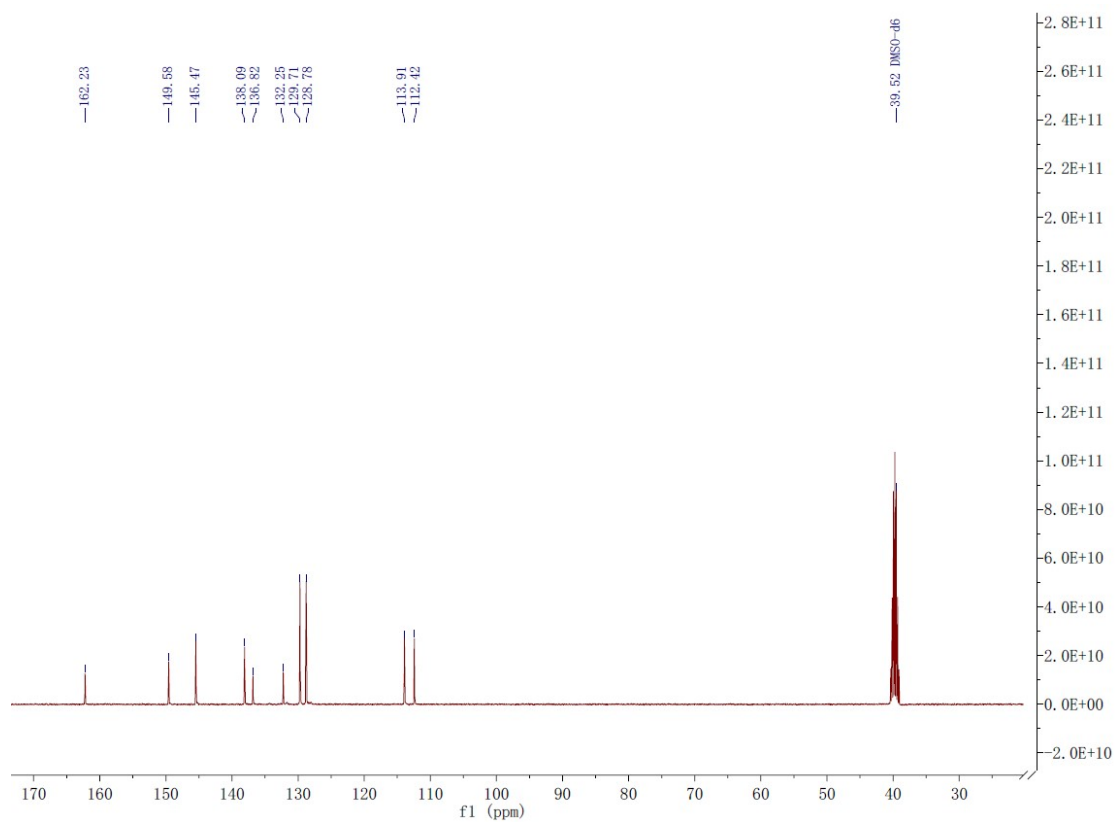

Figure 8.  $^{13}\text{C}$  NMR of **3d** (100 MHz, DMSO)

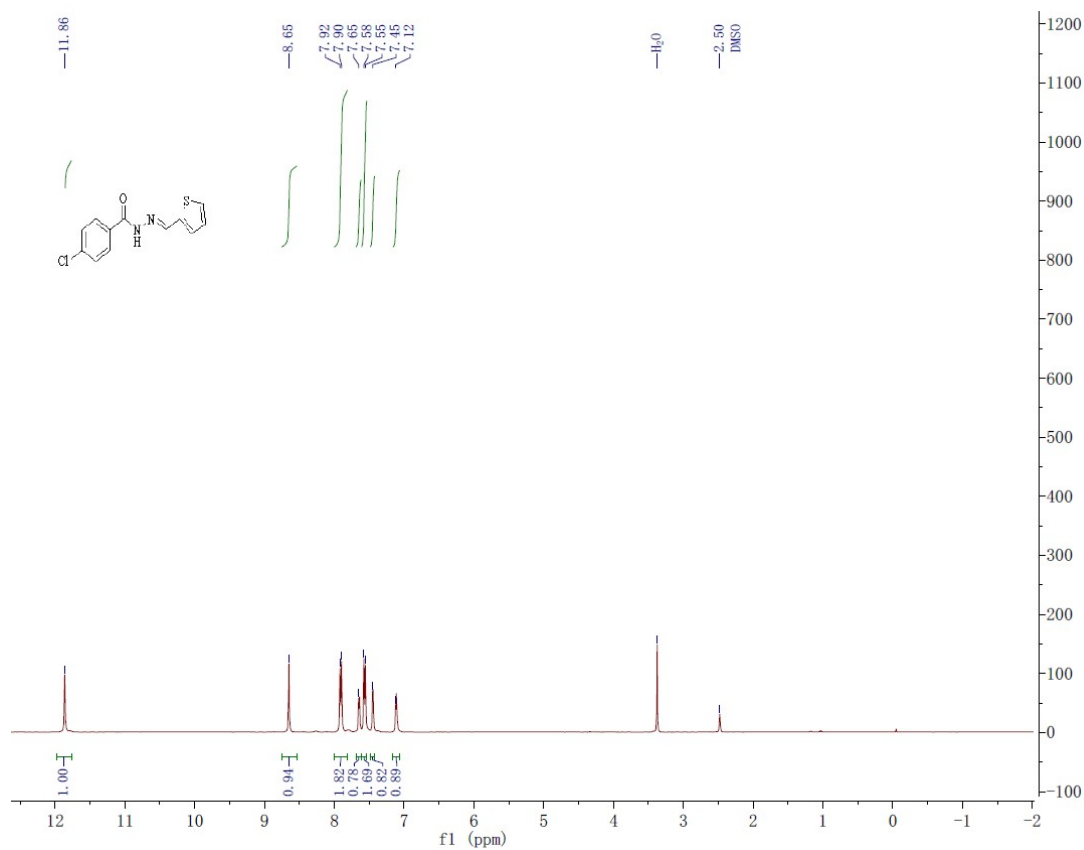

Figure 9.  $^1\text{H}$  NMR of **3e** (400 MHz, DMSO)

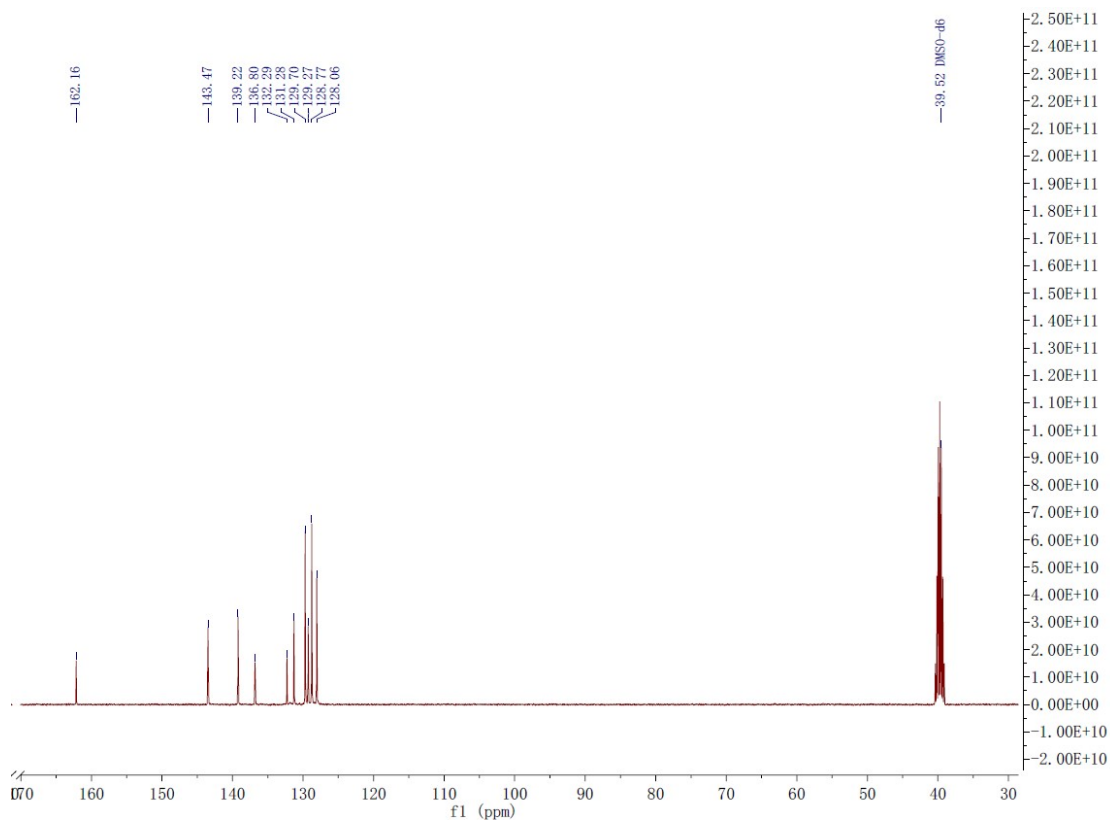

Figure 10.  $^{13}\text{C}$  NMR of **3e** (100 MHz, DMSO)

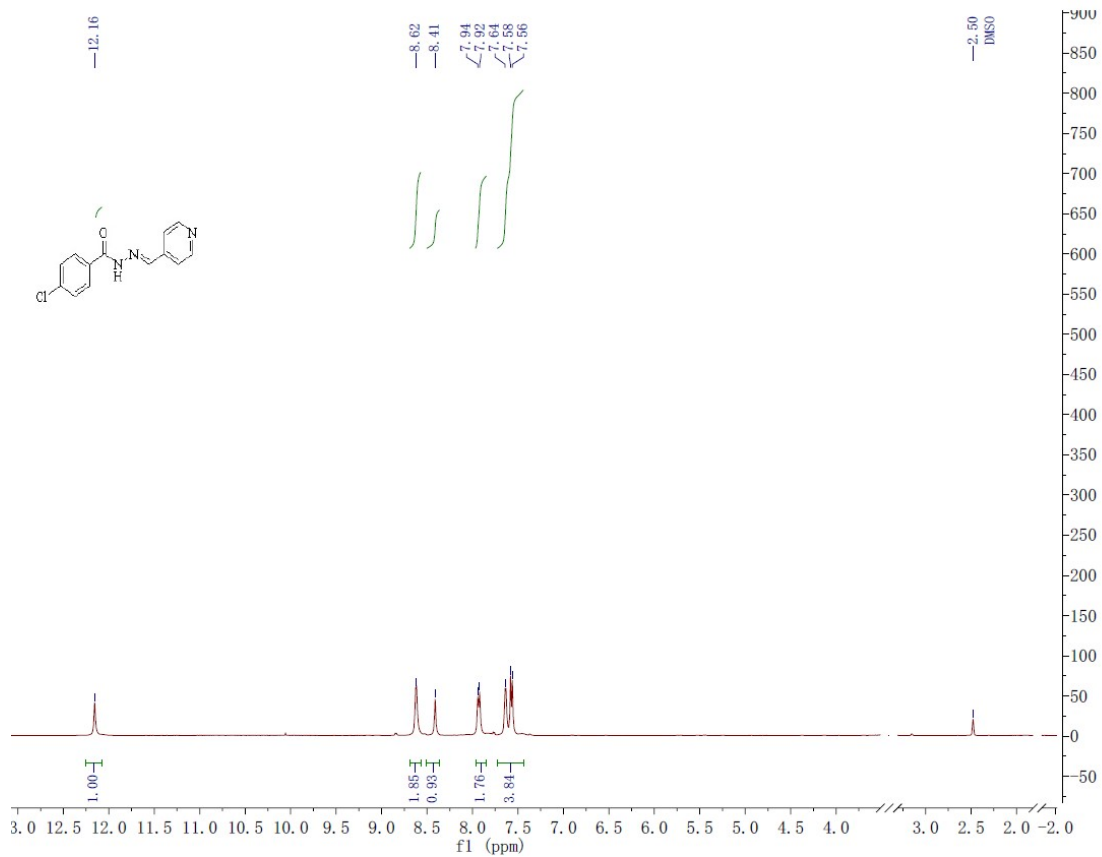

Figure 11.  $^1\text{H}$  NMR of **3f** (400 MHz, DMSO)

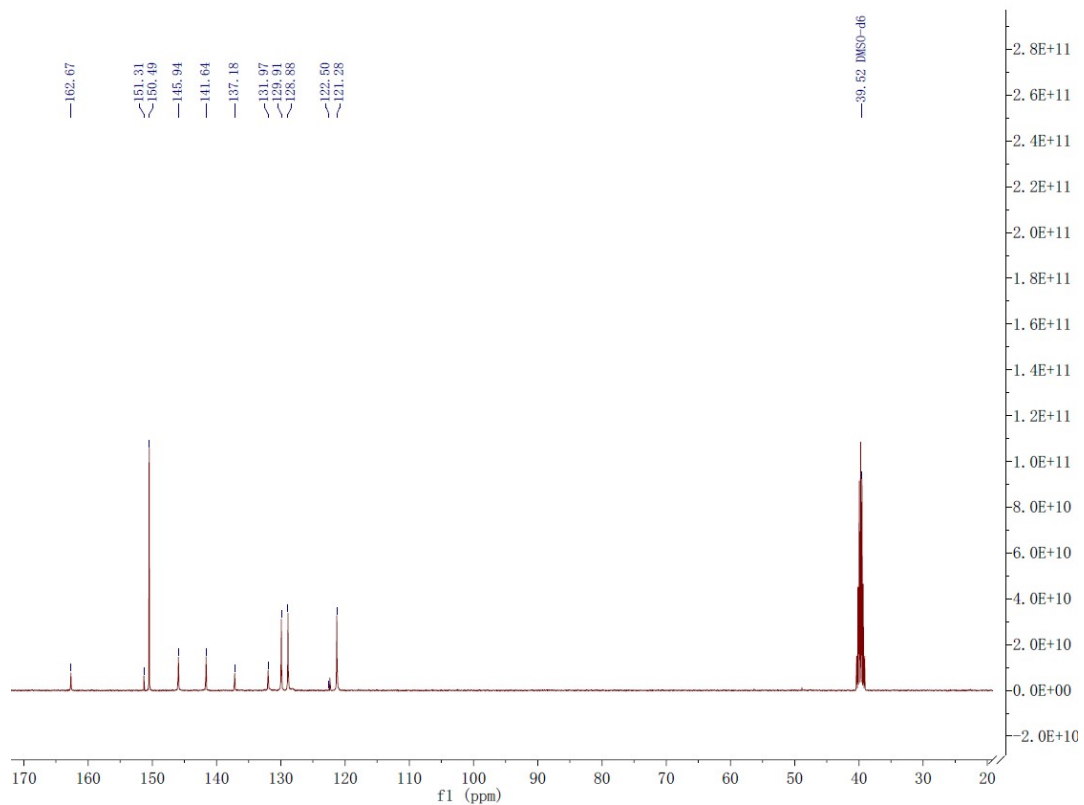

Figure 12.  $^{13}\text{C}$  NMR of **3f** (100 MHz, DMSO)

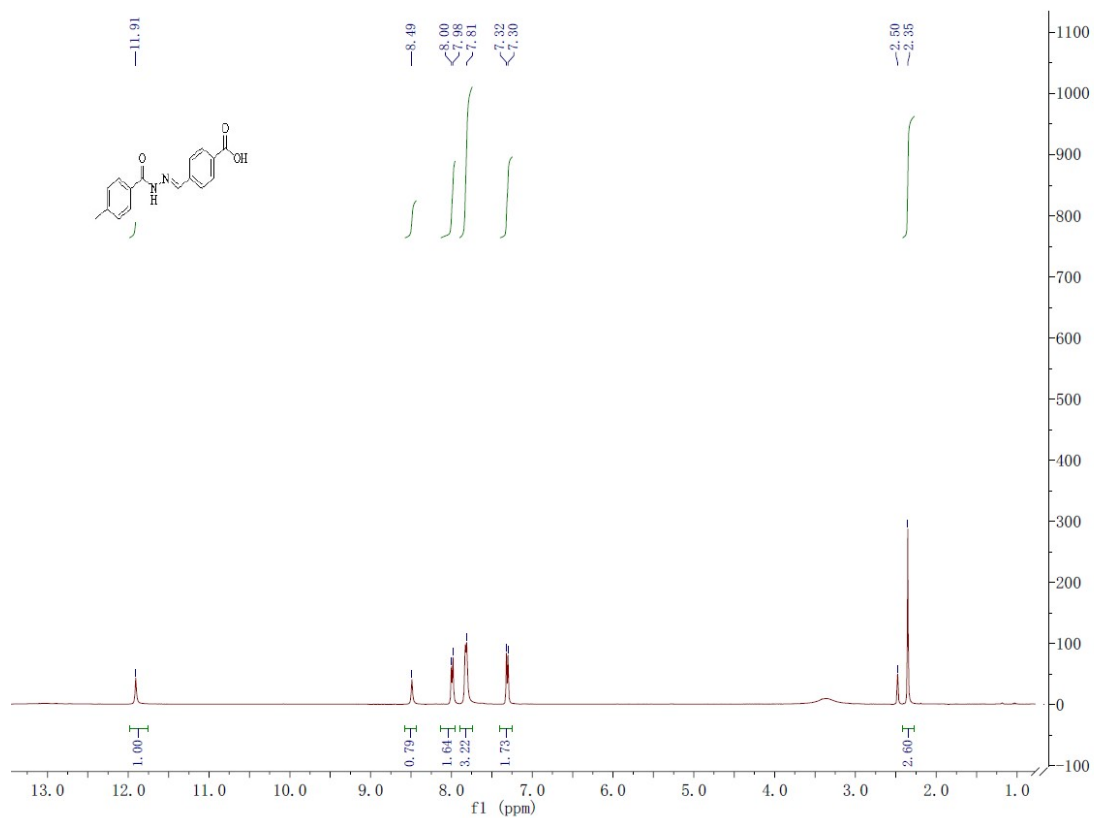

Figure 13.  $^1\text{H}$  NMR of **3g** (400 MHz, DMSO)

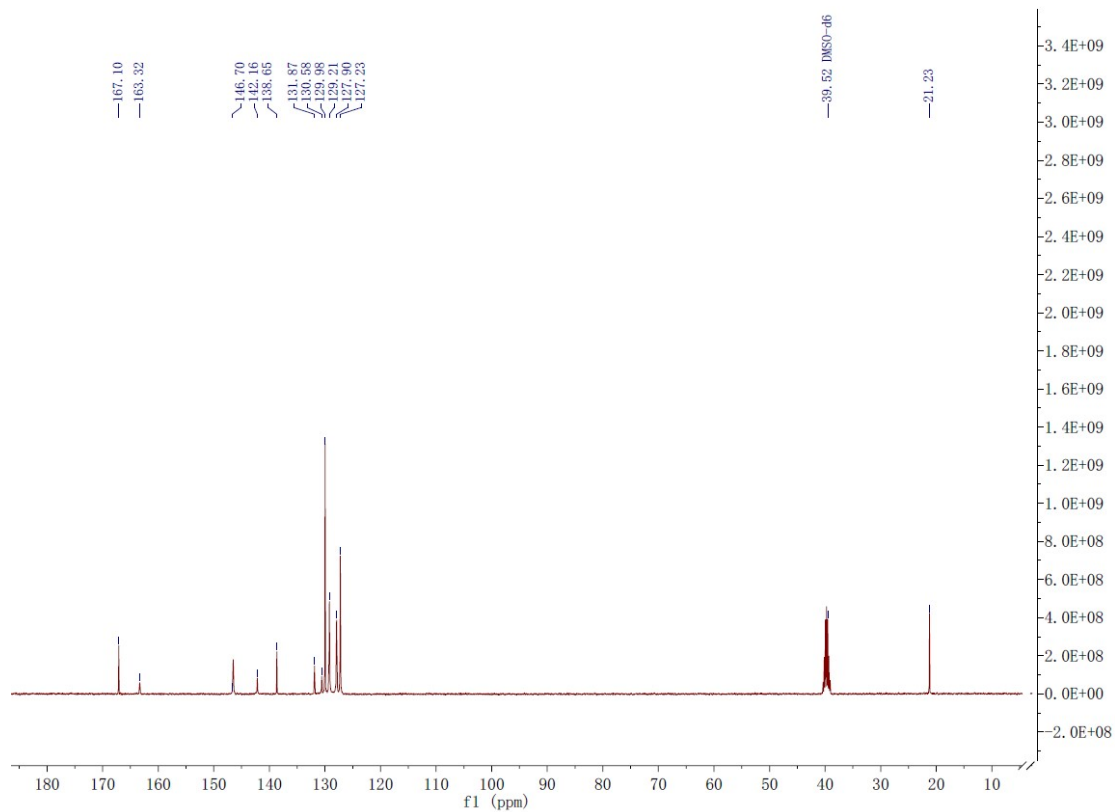

Figure 14.  $^{13}\text{C}$  NMR of **3g** (100 MHz, DMSO)

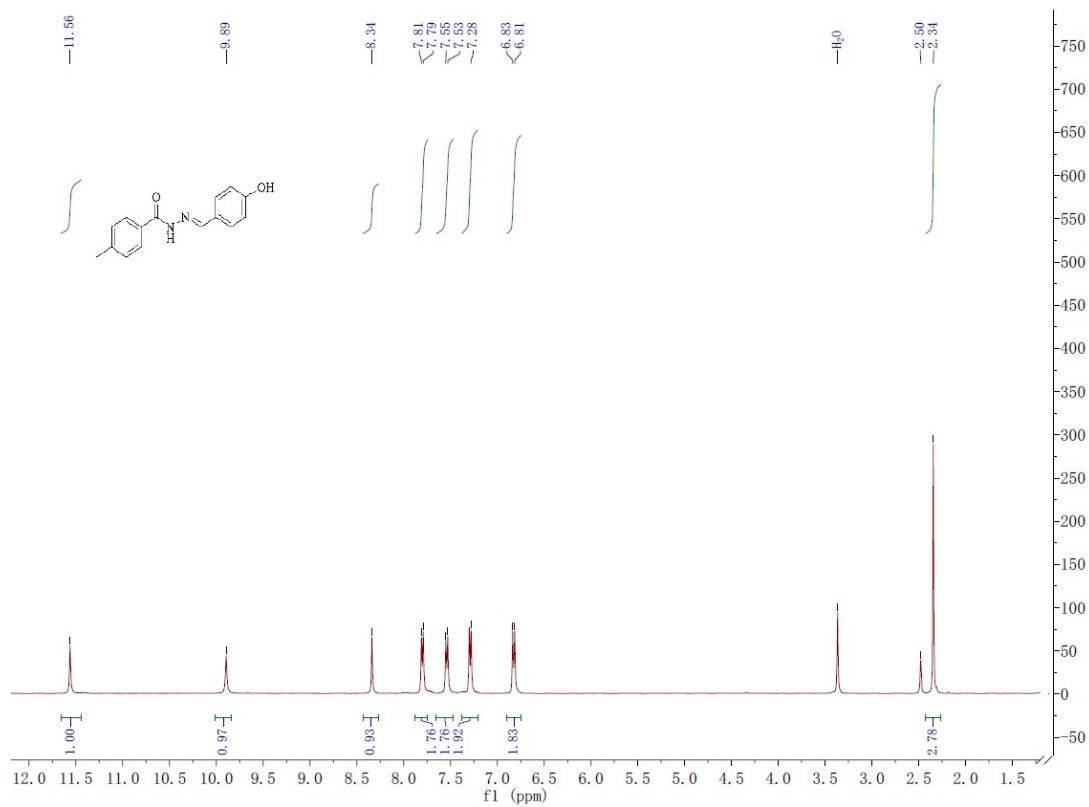

Figure 15.  $^1\text{H}$  NMR of **3h** (400 MHz, DMSO)

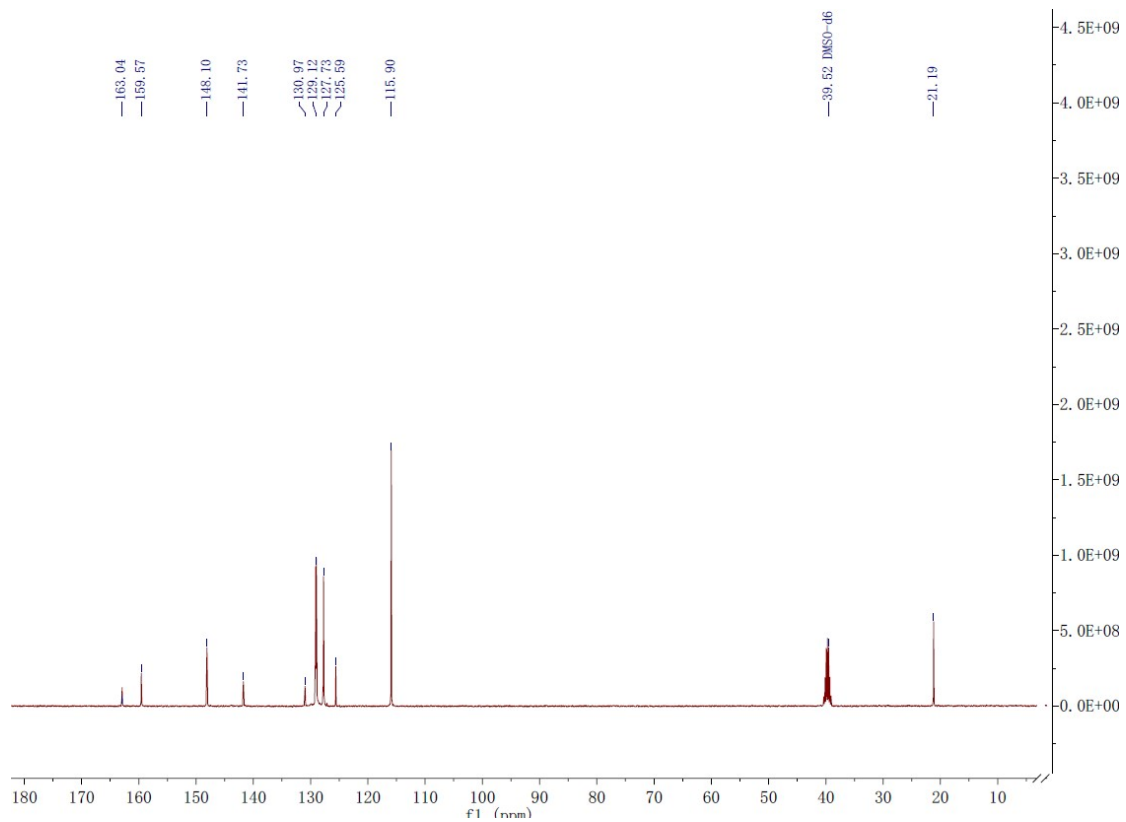

Figure 16.  $^{13}\text{C}$  NMR of **3h** (100 MHz, DMSO)

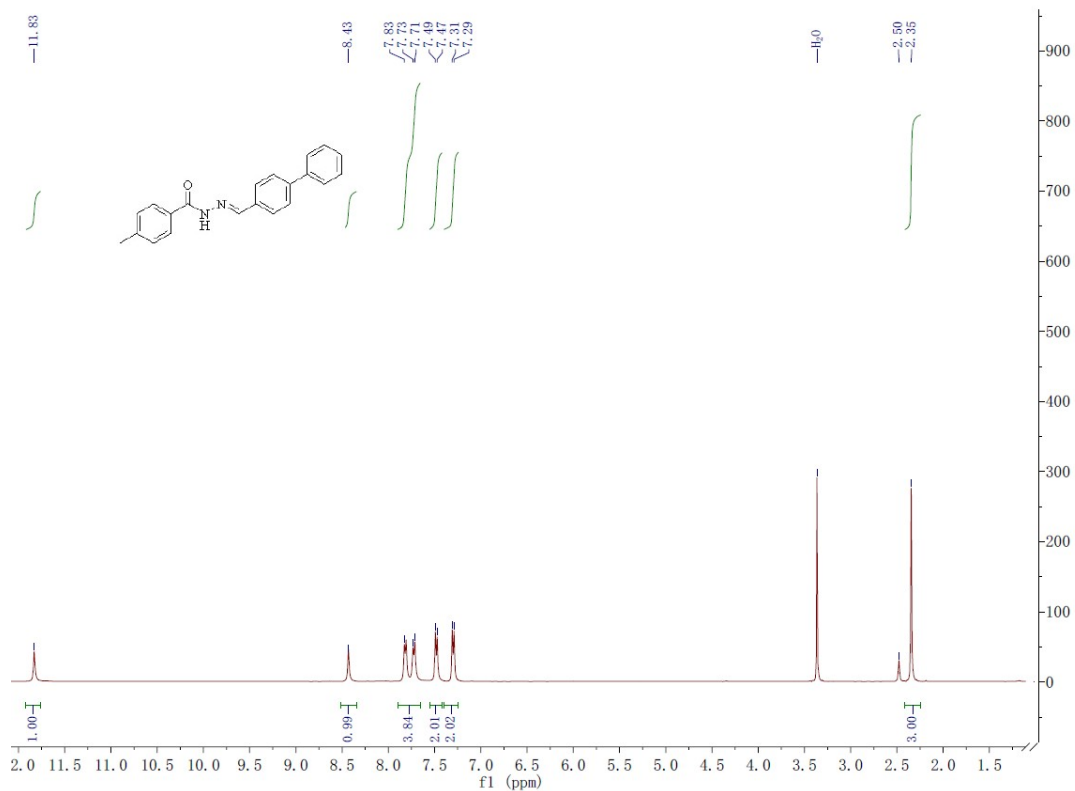

Figure 17.  $^1\text{H}$  NMR of **3i** (400 MHz, DMSO)

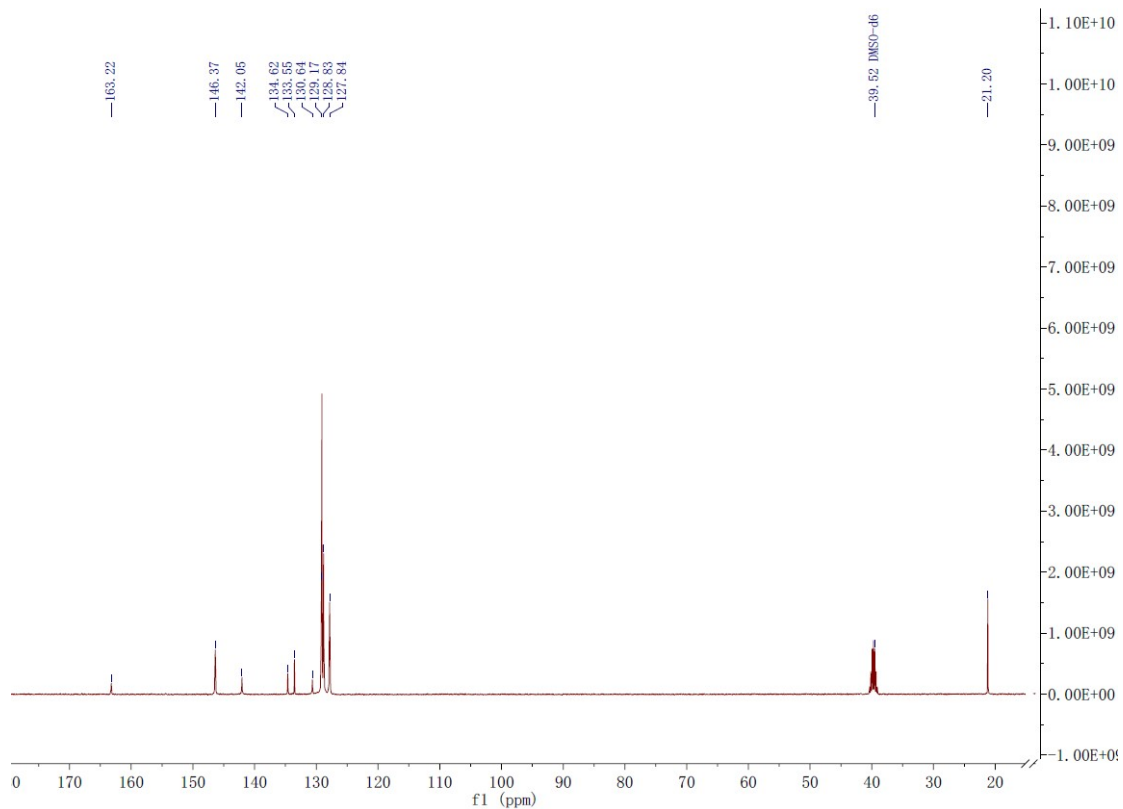

Figure 18.  $^{13}\text{C}$  NMR of **3i** (100 MHz, DMSO)

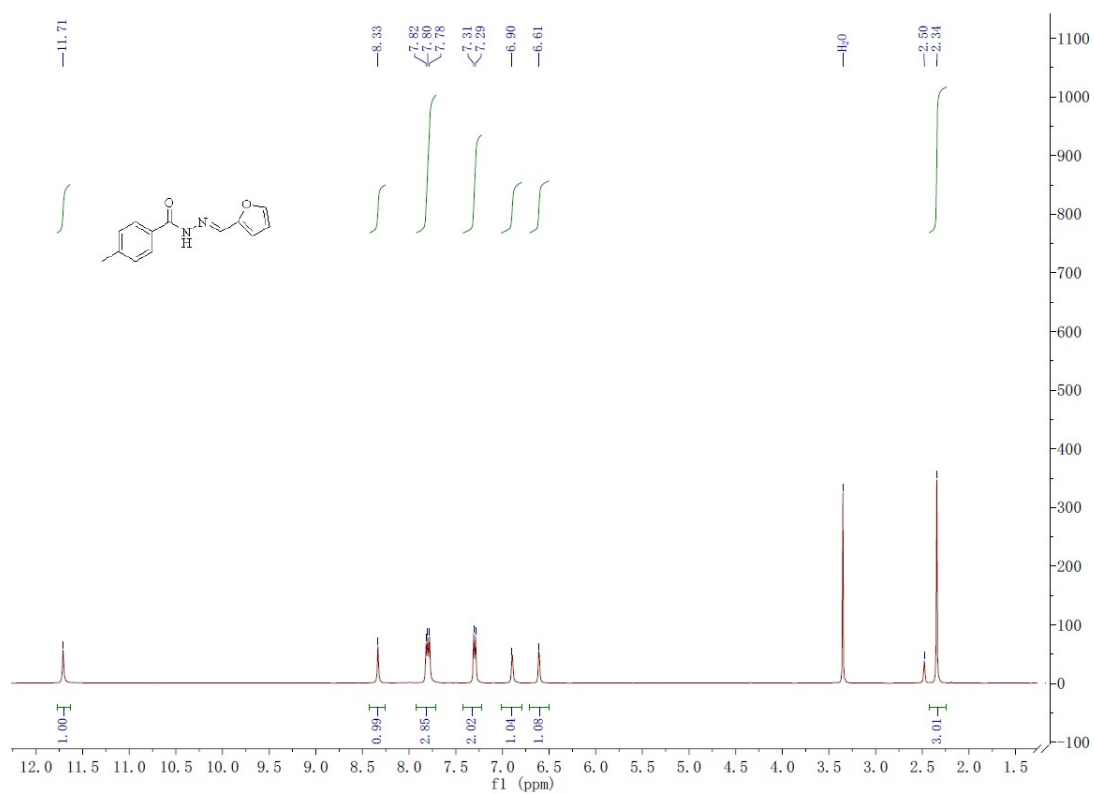

Figure 19.  $^1\text{H}$  NMR of **3j** (400 MHz, DMSO)

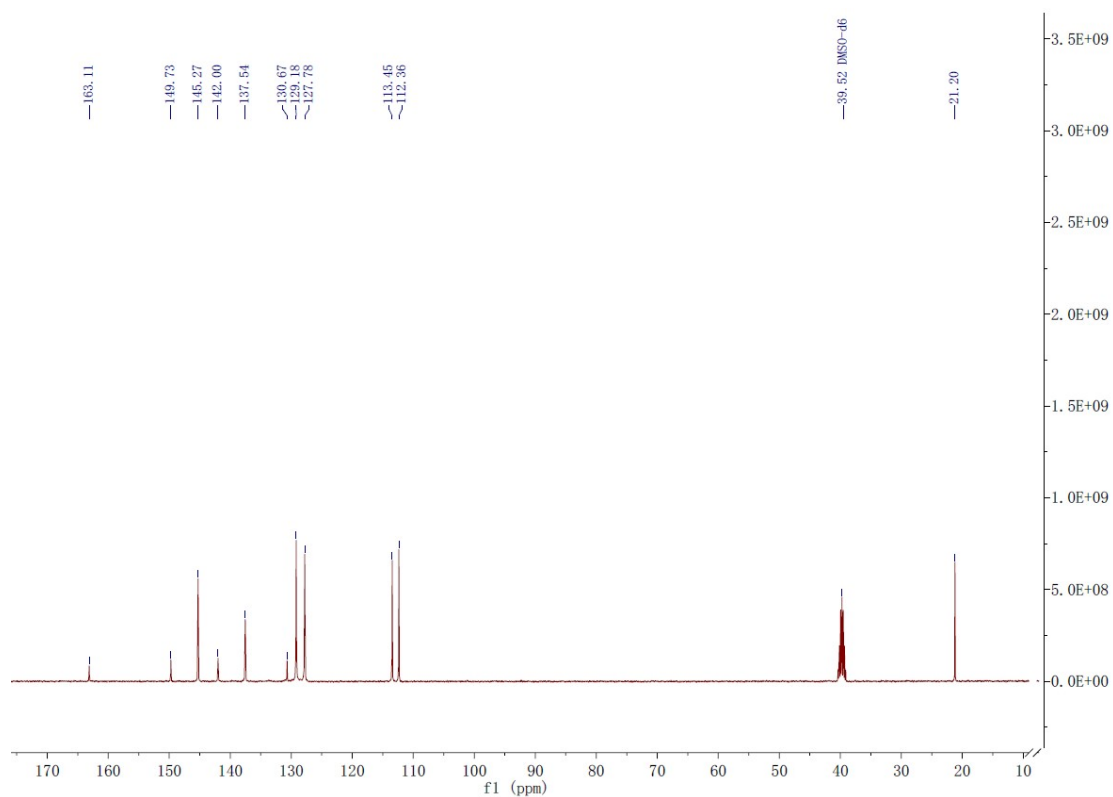

Figure 20.  $^{13}\text{C}$  NMR of **3j** (100 MHz, DMSO)

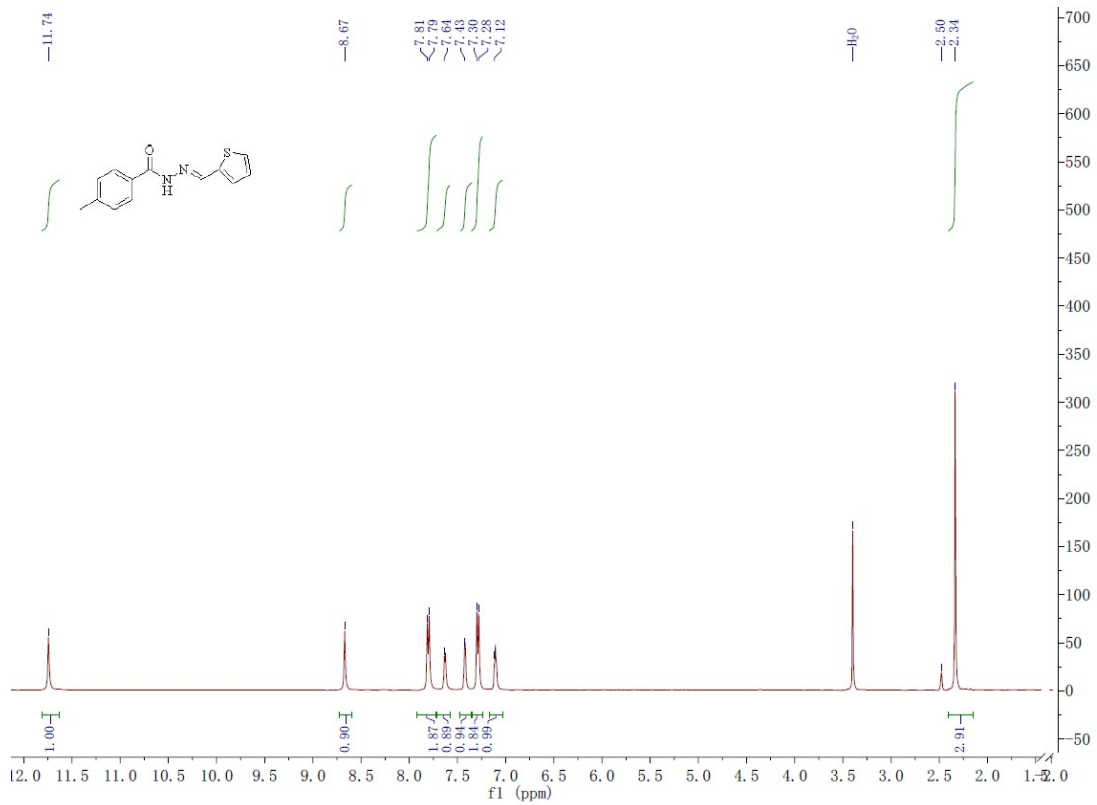

Figure 21.  $^1\text{H}$  NMR of **3k** (400 MHz, DMSO)

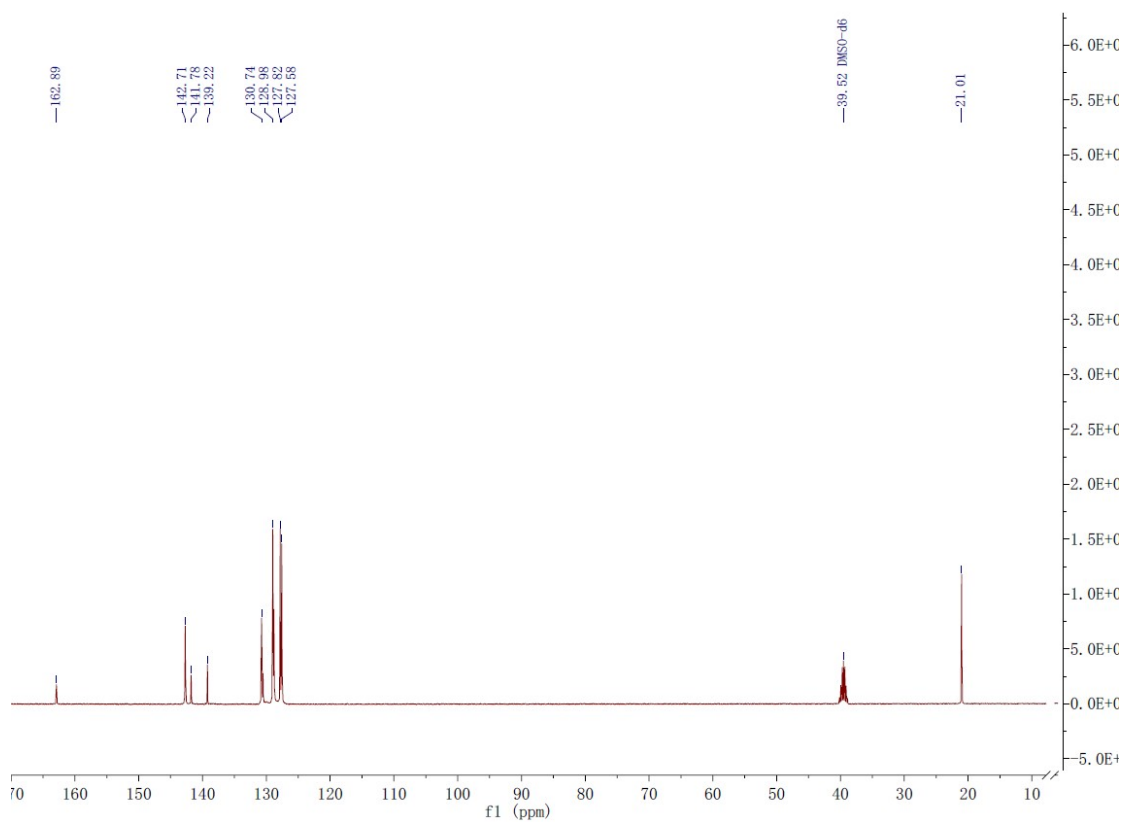

Figure 22.  $^{13}\text{C}$  NMR of **3k** (100 MHz, DMSO)

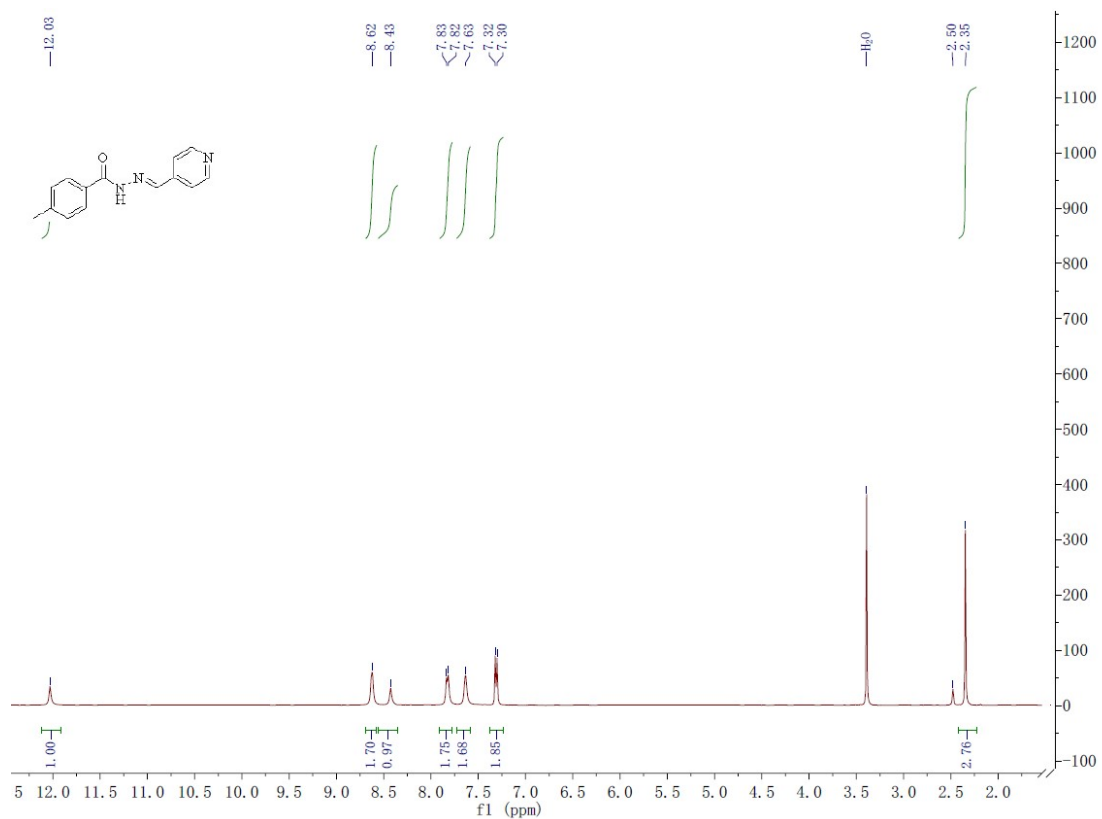

Figure 23.  $^1\text{H}$  NMR of **3I** (400 MHz, DMSO)

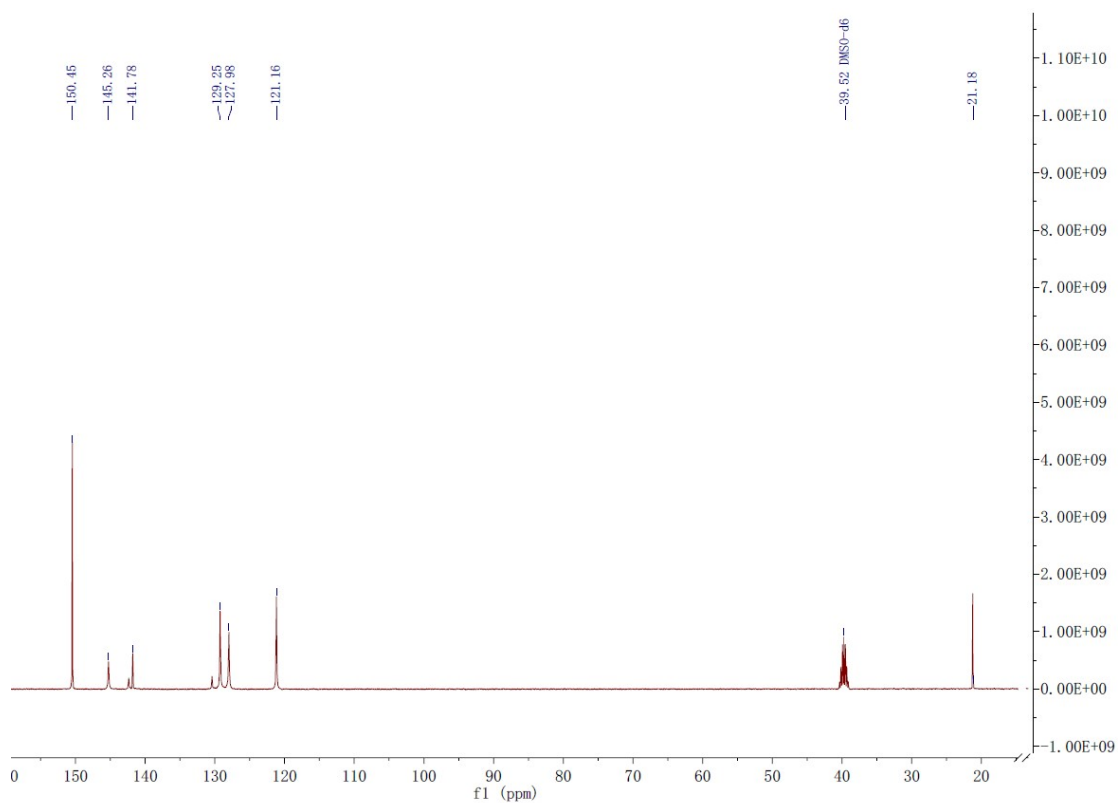

Figure 24.  $^{13}\text{C}$  NMR of **3I** (100 MHz, DMSO)

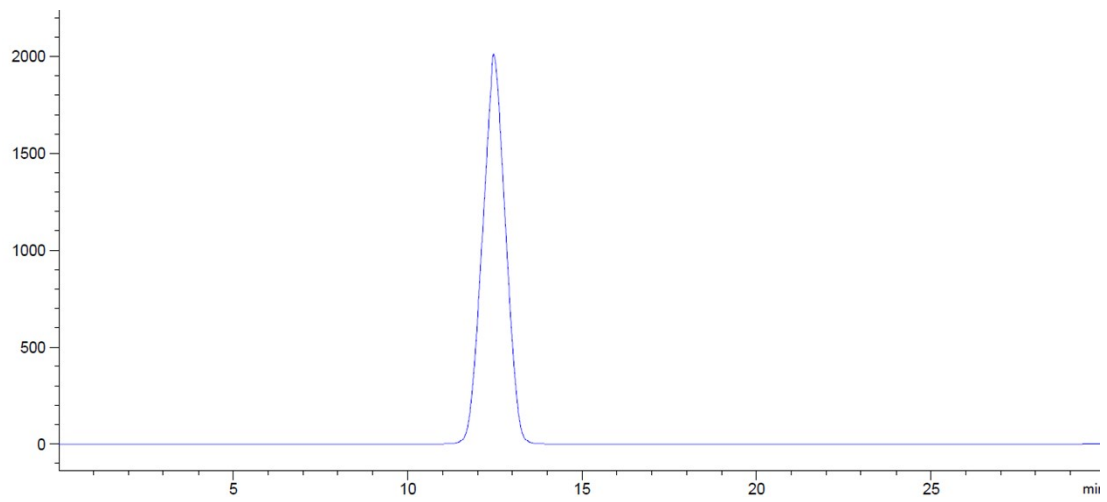

Figure 25. HPLC chromatograms of **3d**

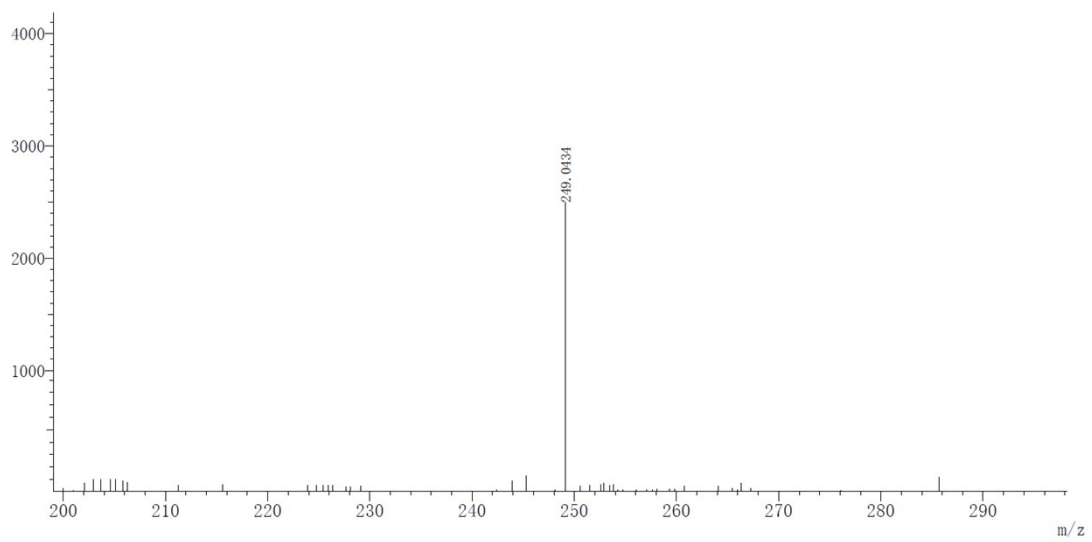

Figure 26. Mass spectrum of **3d**
